# Supplementary material
Source: publisher figshare collection journal article supplement (https://acs.figshare.com/ndownloader/files/17505536)
Supplement: Supplementary file 1 [file 17505536]

## Supporting Information

### **AgBr Nanoparticles in Situ Growth on 2D MoS<sub>2</sub> Nanosheets for Rapid Bacteria-Killing and Photodisinfection**

*Weidong Zhu<sup>a</sup>, Xiangmei Liu<sup>a\*</sup>, Lei Tan<sup>a</sup>, Zhenduo Cui<sup>b</sup>, Xianjin Yang<sup>b</sup>, Yanqin Liang<sup>b</sup>,  
Zhaoyang Li<sup>b</sup>, Shengli Zhu<sup>b</sup>, Kelvin Wai Kwok Yeung<sup>c</sup> and Shuilin Wu<sup>a,b\*</sup>*

<sup>a</sup> Ministry-of-Education Key Laboratory for the Green Preparation and Application of Functional Materials, Hubei Key Laboratory of Polymer Materials, School of Materials Science & Engineering, Hubei University, Wuhan 430062, China

<sup>b</sup> School of Materials Science & Engineering, the Key Laboratory of Advanced Ceramics and Machining Technology by the Ministry of Education of China, Tianjin University, Tianjin 300072, China

<sup>c</sup> Department of Orthopaedics & Traumatology, Li KaShing Faculty of Medicine, The University of Hong Kong, Pokfulam, Hong Kong 999077, China

\* To whom correspondence should be addressed:

E-mail: [liuxiangmei1978@163.com](mailto:liuxiangmei1978@163.com); [shuilin.wu@gmail.com](mailto:shuilin.wu@gmail.com); [shuilinwu@tju.edu.cn](mailto:shuilinwu@tju.edu.cn)

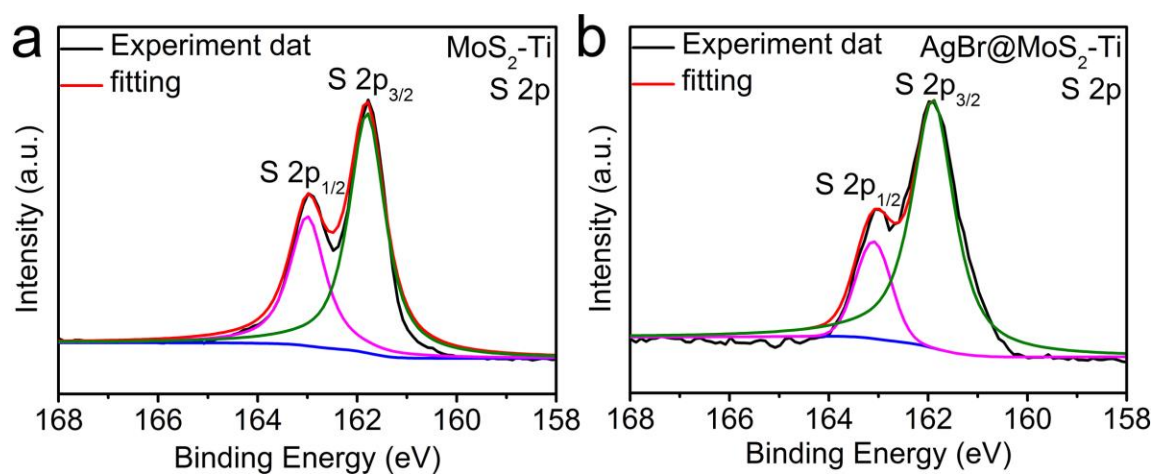

**Figure S1.** (a) The high-resolution S 2p spectra of MoS<sub>2</sub>-Ti. (b) The high-resolution spectrum of S 2p in AgBr@MoS<sub>2</sub>-Ti.

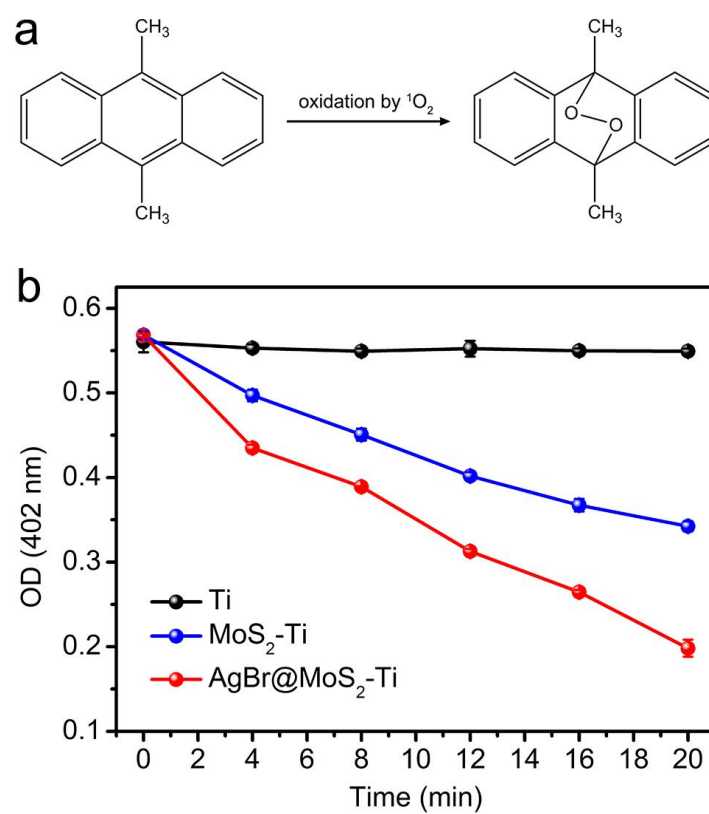

**Figure S2.** (a) DMA reaction with  $^1\text{O}_2$  forming an endoperoxide. (b) Decay curves of the absorption of DMA as the irradiation time

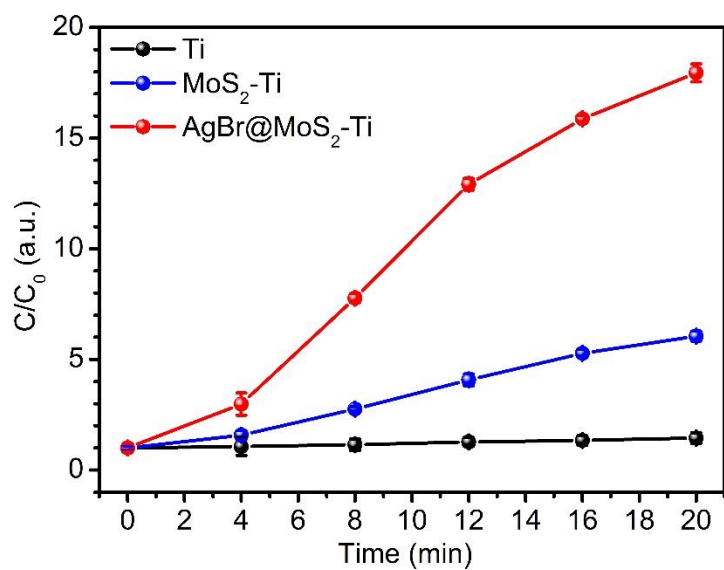

**Figure S3.** The fluorescence intensity of DCF at 525 nm with different samples of Ti, MoS<sub>2</sub>-Ti and AgBr@MoS<sub>2</sub>-Ti after irradiated with 660 nm light. C: fluorescence intensity at different times, C<sub>0</sub>: fluorescence intensity in initial value.

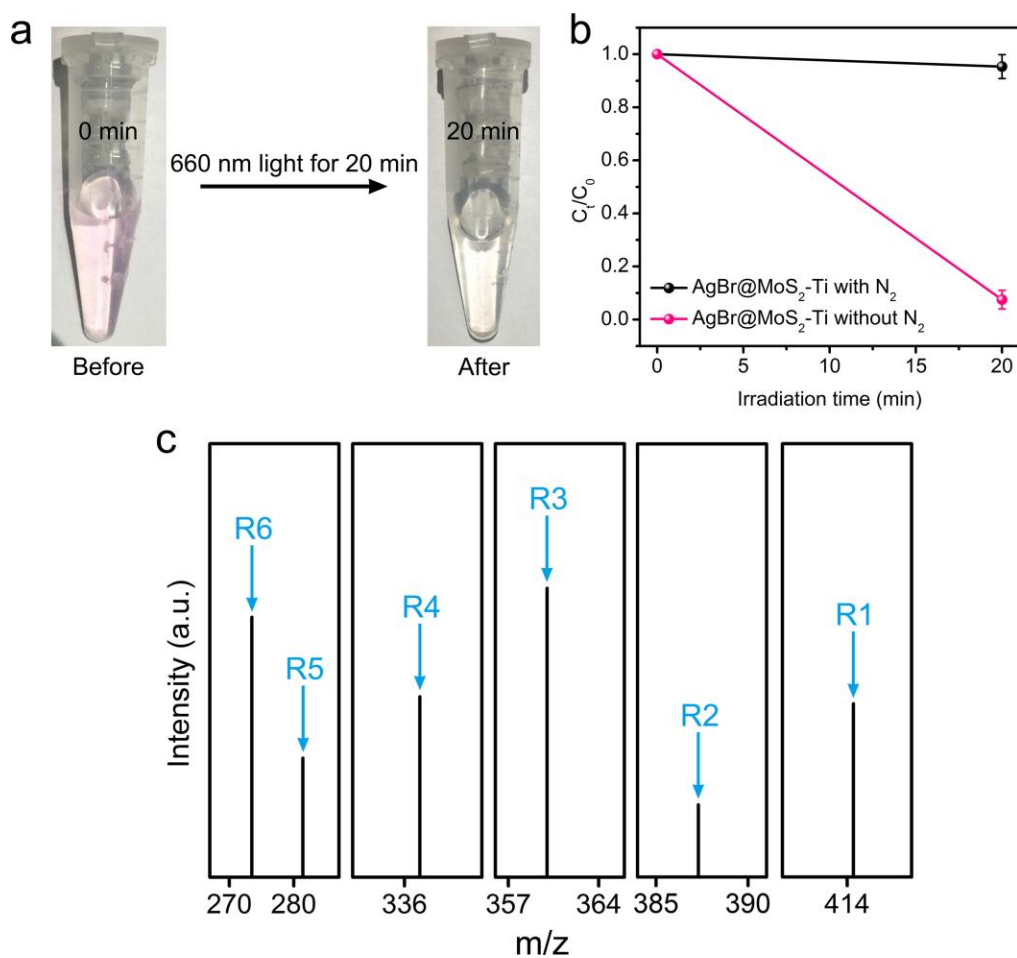

**Figure S4.** (a) The image of RhB solution before and after 660 nm light. (b) Photocatalytic degradation of RhB on AgBr@MoS<sub>2</sub>-Ti with N<sub>2</sub> or without N<sub>2</sub>. (c) LC-MS spectra of degradation products of RhB by AgBr@MoS<sub>2</sub>-Ti.

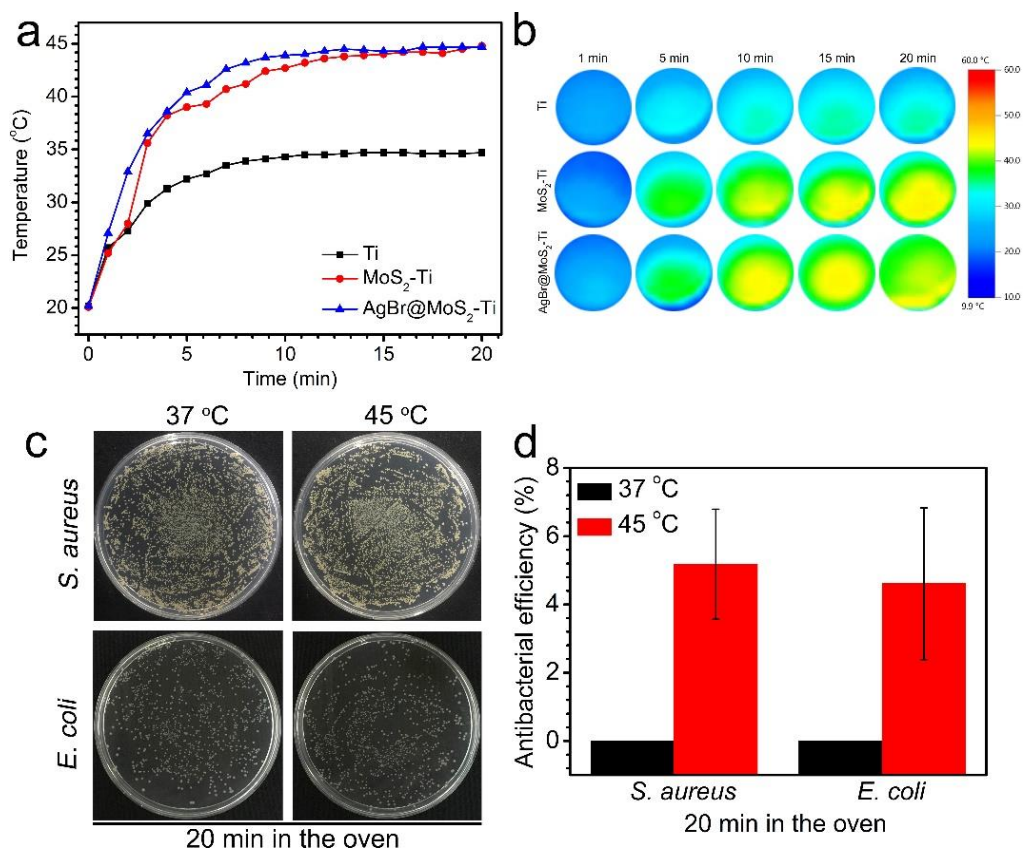

**Figure S5.** (a) The temperature change curve and (b) Infrared thermography of Ti, MoS<sub>2</sub>-Ti, and AgBr@MoS<sub>2</sub>-Ti irradiated by 660 nm light for 20 min. (c) The surface plate results and (d) antibacterial efficiency of *S. aureus* and *E. coli* cultured at 37 °C and 42 °C in the oven for 20 min.

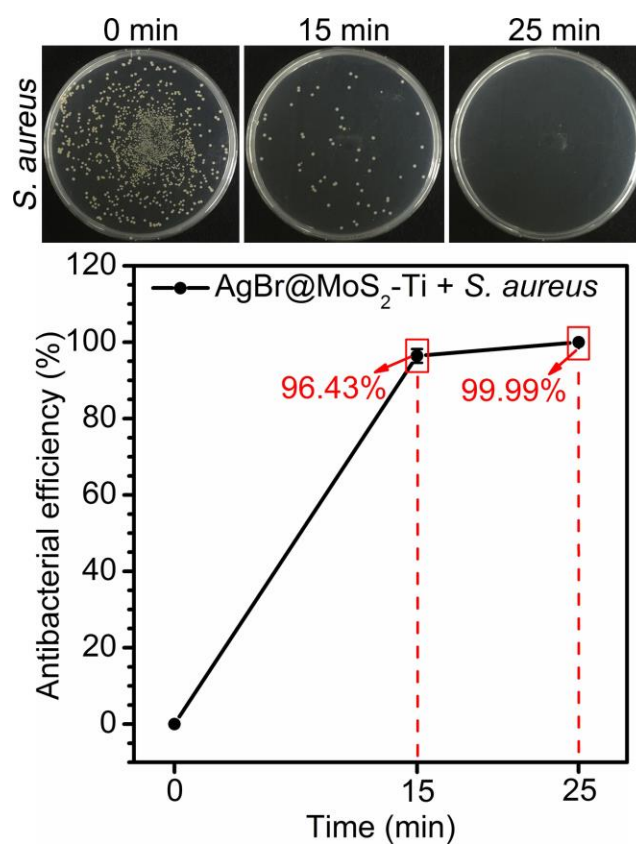

**Figure S6.** The surface plate and the antibacterial efficiency of *S. aureus* after 660 nm light irradiation for 0, 15 and 25 min.

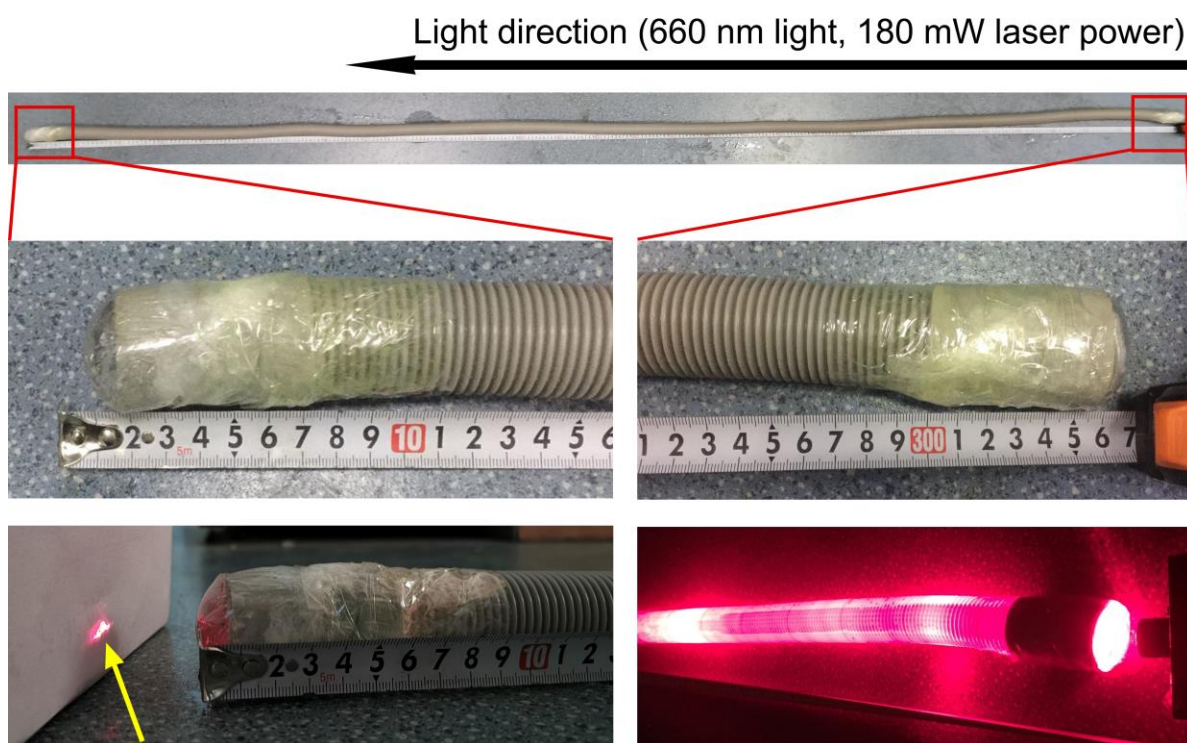

**Figure S7.** The penetrating distance of 660 nm light in water.



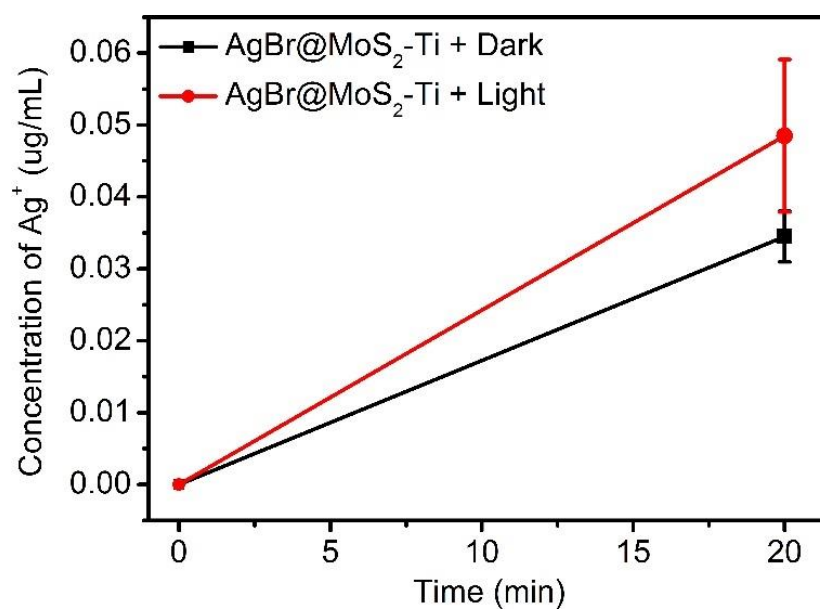

**Figure S8.** The  $\text{Ag}^+$  release curves obtained by immersion of AgBr@MoS<sub>2</sub>-Ti in PBS after 20 min 660 nm light irradiation or in darkness for 20 min.

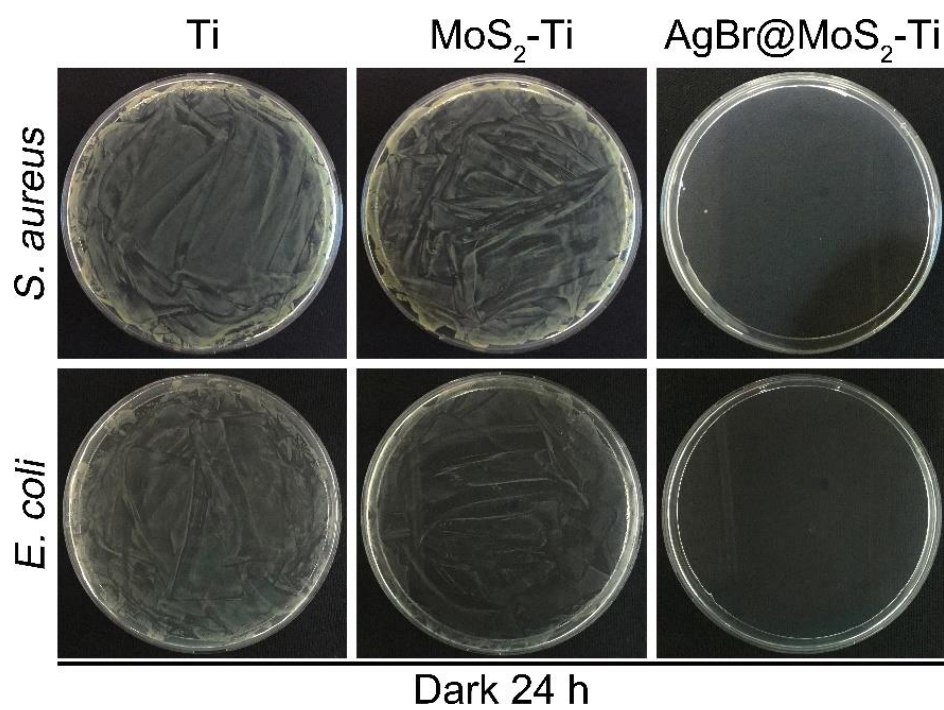

**Figure S9.** The surface plate of *S. aureus* and *E. coli* of Ti, MoS<sub>2</sub>-Ti and AgBr@MoS<sub>2</sub>-Ti in darkness for 24 h.

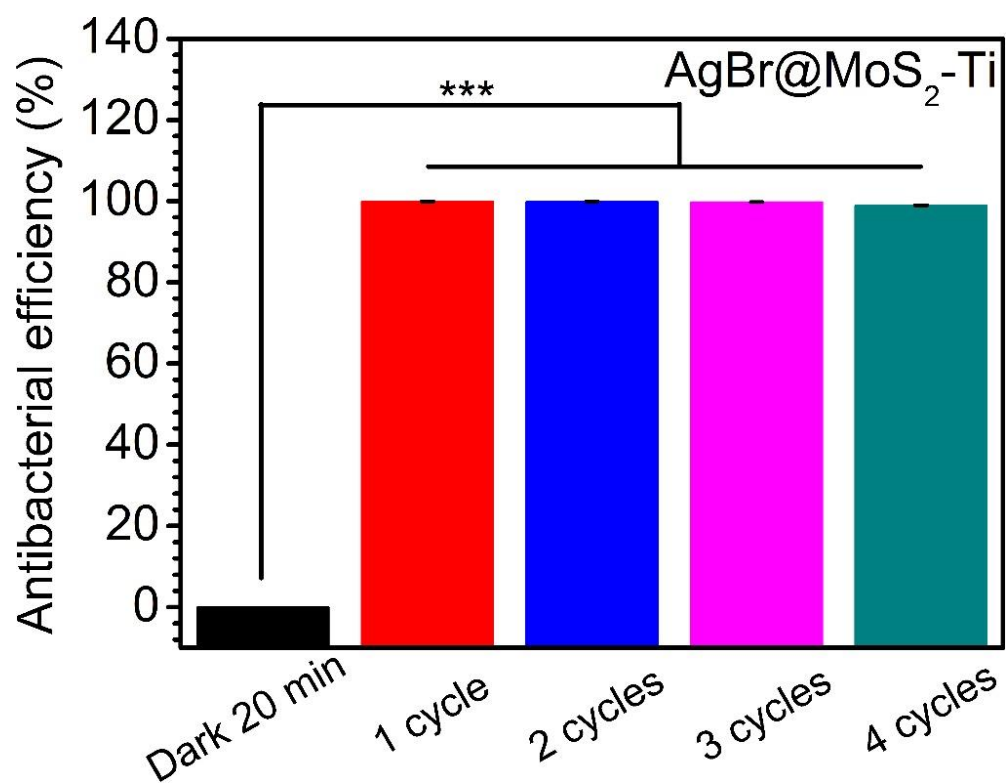

**Figure S10.** The abilities of AgBr@MoS<sub>2</sub>-Ti to kill *S. aureus*. The AgBr@MoS<sub>2</sub>-Ti were repeatedly challenged with *S. aureus* in the darkness and under 660 nm light for 20 min, respectively, repeatedly up to four times.

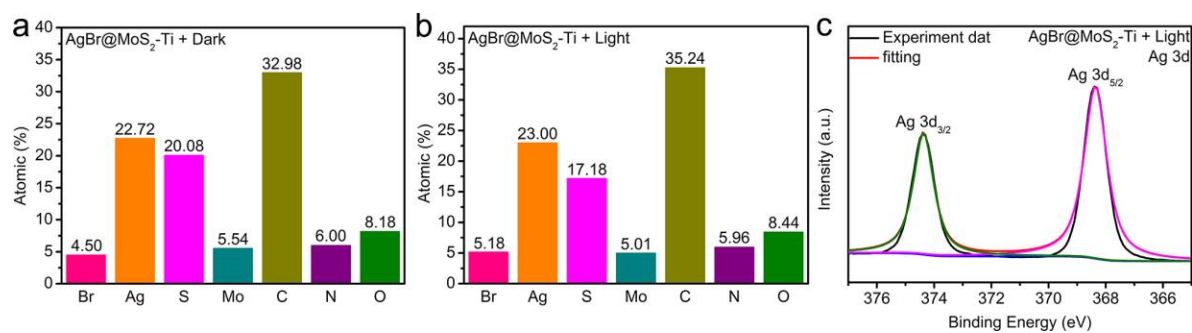

**Figure S11.** XPS analysis of the content of elements in AgBr@MoS<sub>2</sub>-Ti (a) in the darkness or (b) after irradiation for 20 min. (c) The peak of Ag3d from AgBr@MoS<sub>2</sub>-Ti after irradiation.

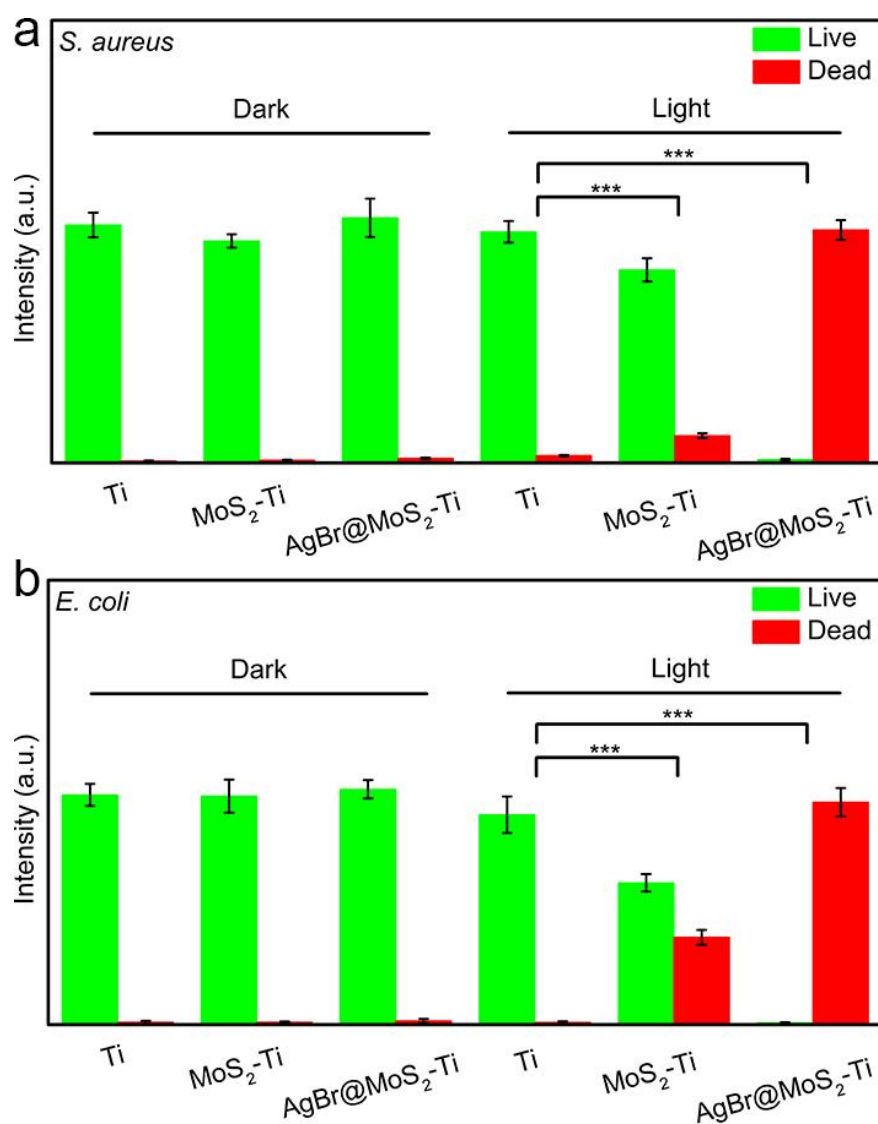

**Figure S12.** Quantitative analysis of the live/dead staining (a) *S. aureus* and (b) *E. coli* by using Image J software (n = 3, mean  $\pm$  SD: \*\*\*p < 0.001).

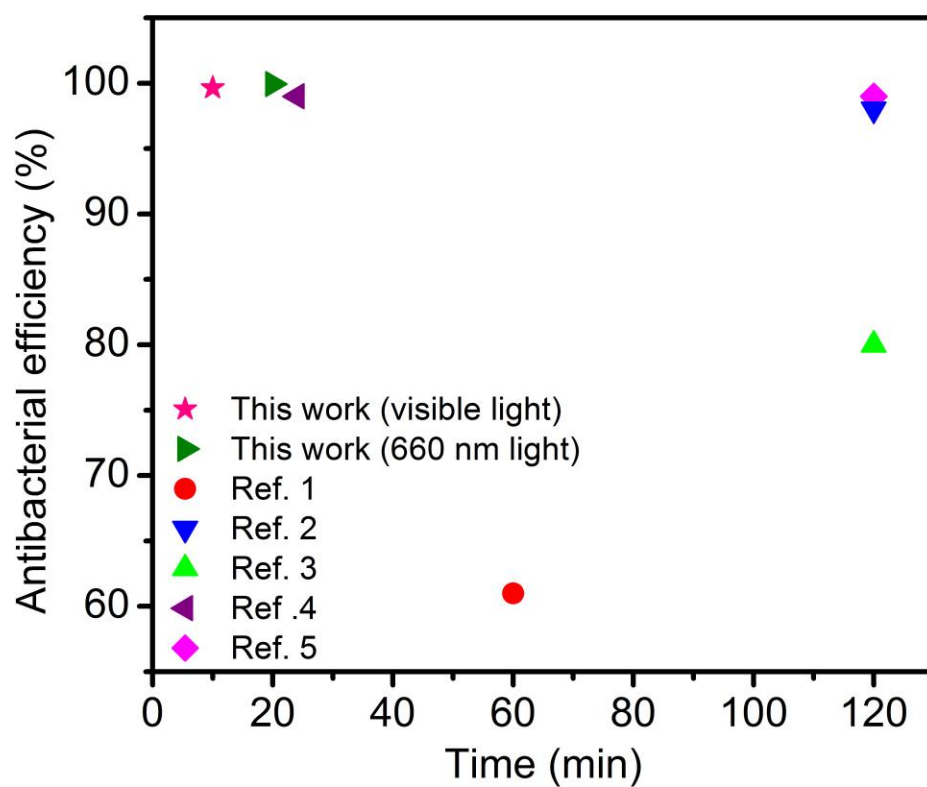

**Figure S13.** Antibacterial efficiency comparison among other recent MoS<sub>2</sub>-based and AgBr-based photocatalysts.

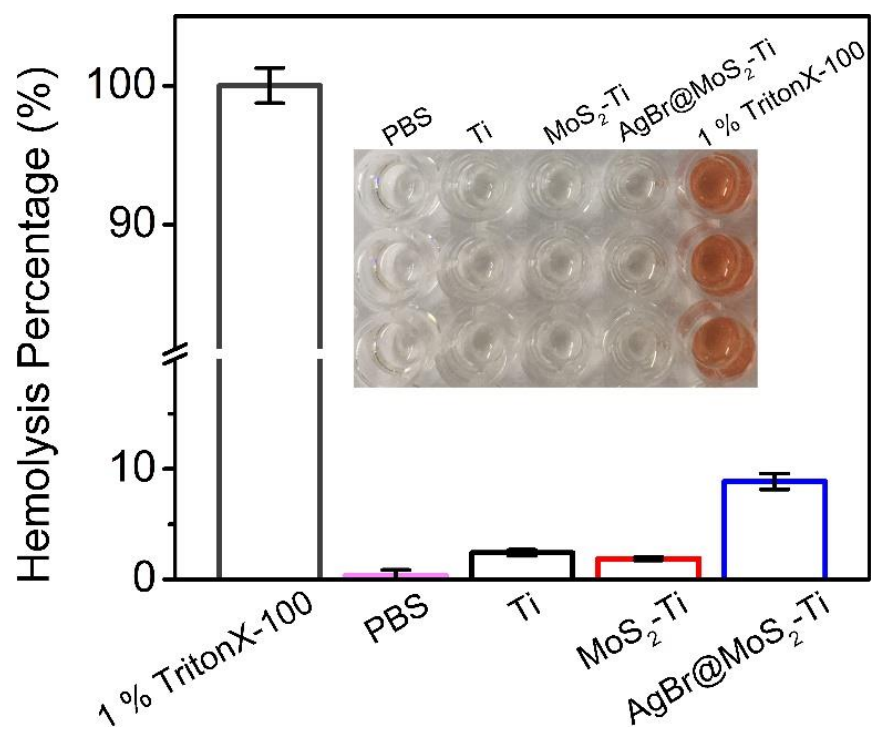

**Figure S14.** Hemolysis percentage of the samples and the corresponding images.

## References

- (1) Tian, X.; Sun, Y. R.; Fan, S. H.; Boudreau, M. D.; Chen, C. Y.; Ge, C. C.; Yin, J. J. Photogenerated Charge Carriers in Molybdenum Disulfide Quantum Dots with Enhanced Antibacterial Activity. *ACS Appl. Mater. Interfaces* **2019**, *11*, 4858-4866.
- (2) Askari, M. B.; Kalourazi, A. F.; Seifi, M.; Shahangian, S. S.; Askari, Na.; Manjili, T. J. Hydrothermal Synthesis of Molybdenum Disulfide (MoS<sub>2</sub>) and Study of Structure, Optical, Electrical and High Antibacterial Properties. *Optik* **2018**, *174*, 154-162.
- (3) Kim, T. I.; Kwon, B.; Yoon, J.; Park, I. J.; Bang, G. S.; Park, Y. K.; Seo, Y. S.; Choi, S. Y. Antibacterial Activities of Graphene Oxide-Molybdenum Disulfide Nanocomposite Films. *ACS Appl. Mater. Interfaces* **2017**, *9*, 7908-7917.
- (4) Feng, T.; Liang, J. L.; Ma, Z. Y.; Li, M.; Tong, M. P. Bactericidal Activity and Mechanisms of BiOBr-AgBr under Both Dark and Visible Light Irradiation Conditions. *Colloids surf. B* **2018**, *167*, 275-283.
- (5) Xu, Y. G.; Liu, Q. Q.; Liu, C. C.; Zhai, Y. P.; Xie, M.; Huang, L. Y.; Xu, H.; Li, H. M.; Jing, J. J. Visible-Light-Driven Ag/AgBr/ZnFe<sub>2</sub>O<sub>4</sub> Composites with Excellent Photocatalytic Activity for *E. coli* Disinfection and Organic Pollutant Degradation. *J. Colloid Interface Sci.* **2018**, *512*, 555-566.
